# Supplementary material
Source: Springer Nature journal article supplement (https://www.springermedizin.de/resource/supplementary/12881_2012_1105_MOESM6_ESM.pdf/9451980)

**% DNA methylation**

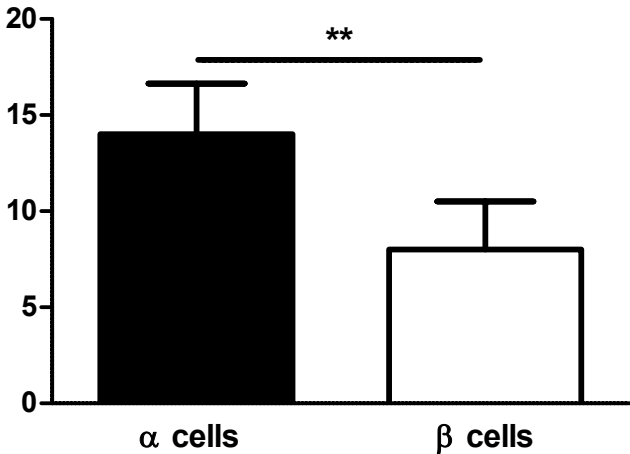

Supplement: MOESM6 [file 9451980]
